# Supplementary material for: Bright persistent green emitting water-dispersible Zn2GeO4:Mn nanorods
Source: Royal Society of Chemistry journal article supplement (doi:10.1039/d0dt00361a), 2020-01-01
Supplement: d0dt00361a1.pdf [file d0dt00361a1.pdf]

## Electronic Supplementary Information

### Bright Persistent Green Emitting Water-Dispersible Zn<sub>2</sub>GeO<sub>4</sub>:Mn Nanorods

Bhupendra B. Srivastava<sup>1</sup>, Santosh K. Gupta<sup>2</sup>, Yang Li<sup>3</sup>, and Yuanbing Mao<sup>4\*</sup>

<sup>1</sup>Department of Chemistry, University of Texas Rio Grande Valley, 1201 West University Drive, Edinburg, Texas 78539, USA

<sup>2</sup>Radiochemistry Division, Bhabha Atomic Research Centre, Trombay, Mumbai-400085, India

<sup>3</sup>School of Physics and Optoelectronic Engineering, Guangdong University of Technology, 100 Waihuanxi Road, Panyu District, Guangzhou 510006, China

<sup>4</sup>Department of Chemistry, Illinois Institute of Technology, 3105 South Dearborn Street, Chicago, IL 60616, USA

\*To whom correspondence should be addressed. ymao17@iit.edu, Tel.: +1-312-567-3815.

#### S1. Quantum yield measurements of the water dispersed ZGOM NRs

The QY of the Zn<sub>2</sub>GeO<sub>4</sub>:Mn NRs was measured relative to fluorescein isothiocyanate (FITC, QY = 92% in 0.1 N NaOH(aq)) with excitation at 492 nm. Fluorescence spectra of the ZGOM NRs and the FITC dye were taken under identical spectrometer conditions in triplicate and averaged. Solutions were degassed with argon in cuvettes. The optical density was kept below 0.1 at the maximum excitation.

$$\Phi_X = \Phi_{ST} \left( \frac{\text{Grad}_X}{\text{Grad}_{ST}} \right) \left( \frac{\eta_X^2}{\eta_{ST}^2} \right)$$

where the subscripts ST and X denote standard and unknown samples, respectively;  $\Phi$  is the fluorescence QY, Grad is the gradient from the plot of integrated fluorescence intensity versus absorbance, and  $\eta$  the refractive index of the solvent which is 1.33 for both standard FITC dye in 0.1 N NaOH and the unknown ZGOM NRs in water.

$$QY(\%) = 92.0 \times \frac{1.83188 \times 10^{-8}}{6.32717 \times 10^{-8}}$$

$$QY(\%) = 26.63 \%$$

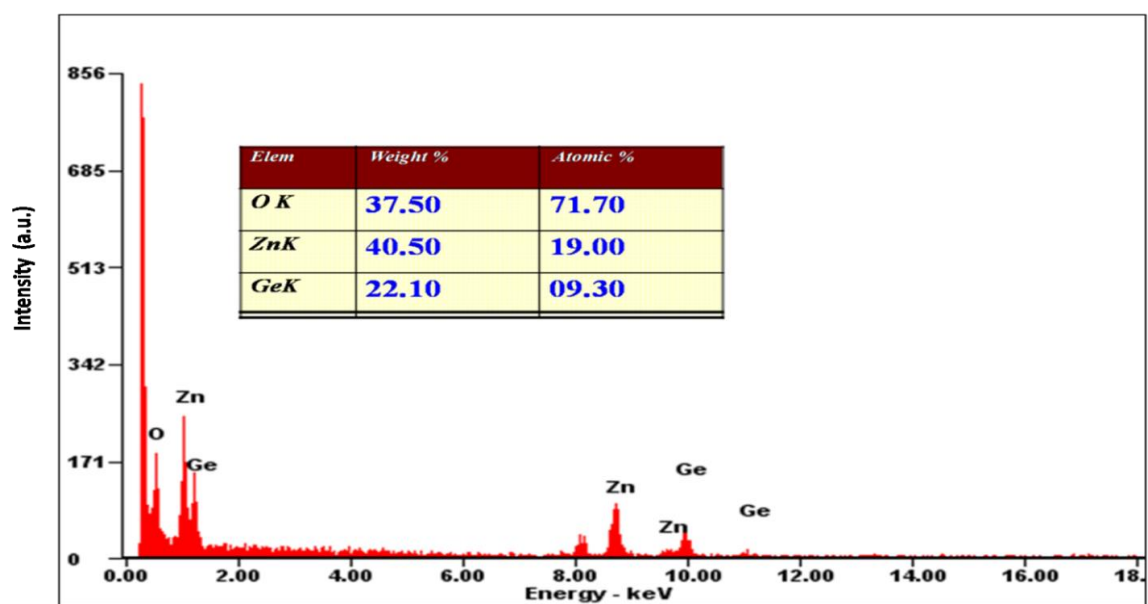

**Figure S1.** EDS spectrum of the  $\text{Zn}_2\text{GeO}_4$  NRs with the inset showing the elemental Zn/Ge ratio.

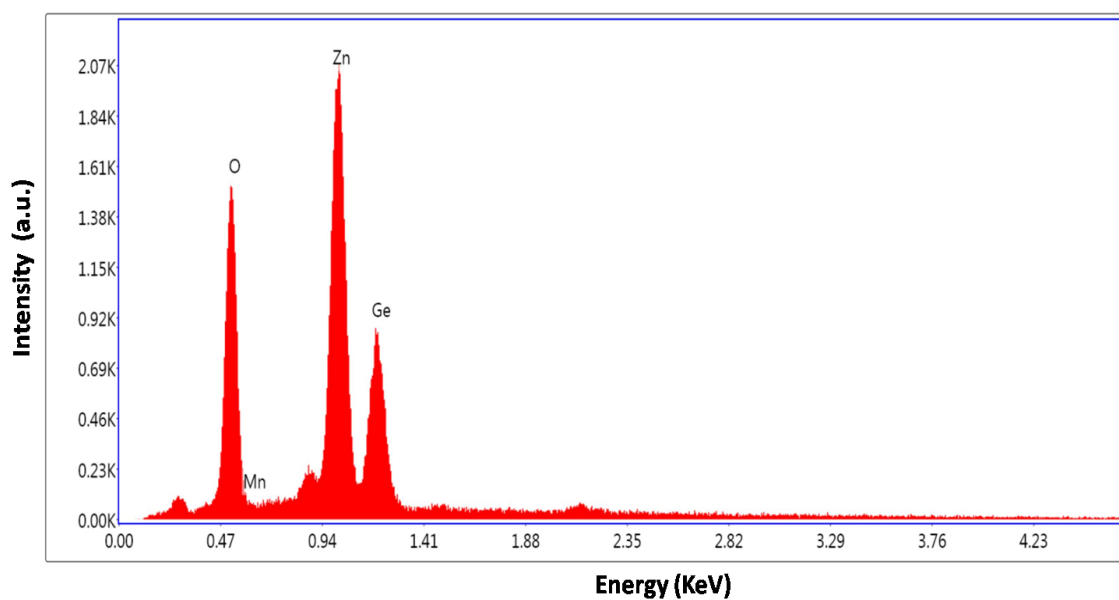

**Figure S2.** EDS spectrum of the  $\text{Zn}_2\text{GeO}_4:\text{Mn}^{2+}$  NRs.

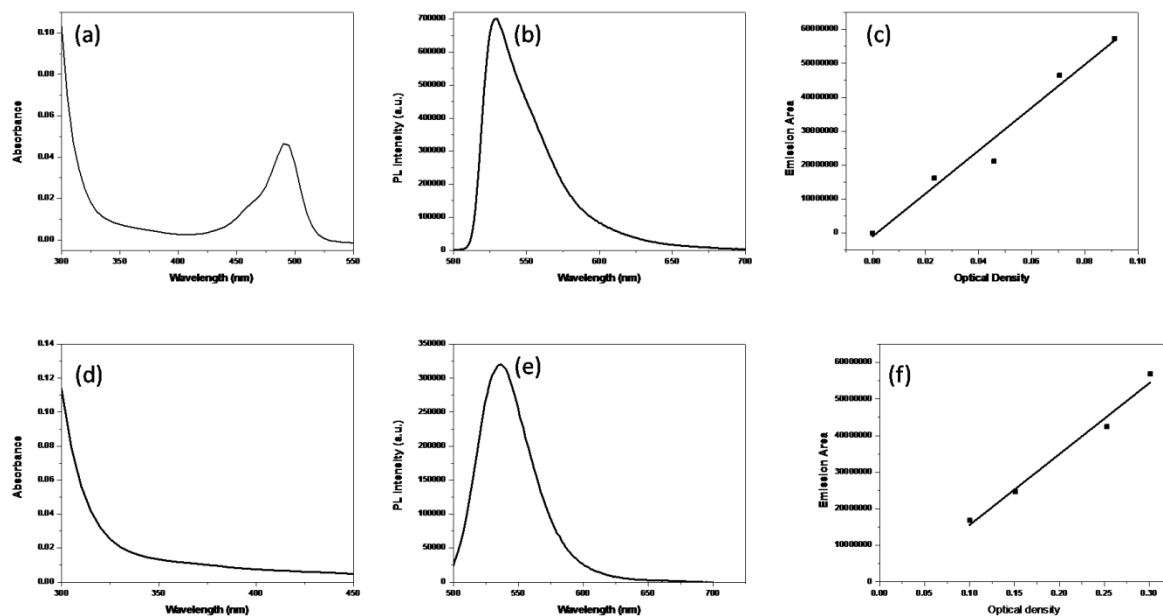

**Figure S3.** Top Panel: (a) UV-visible, (b) PL spectra, and (c) plot of optical density versus emission area using different concentrations of the FITC dye solution (0.1 N NaOH). Excitation wavelength used was 492 nm. Bottom Panel: (d) UV-visible, (e) PL spectra, and (f) plot of optical density versus emission area using different concentrations of the ZGOM NRs in water. Excitation wavelength used was 302 nm. PL Intensity is in arbitrary unit but the numbers are provided for comparison as both measurements of the FITC reference and the ZGOM NRs were carried out by the same fluorimeter.
